# Supplementary material for: Highly stable photoelectrochemical cells for hydrogen production using a SnO2–TiO2/quantum dot heterostructured photoanode
Source: Royal Society of Chemistry journal article supplement (doi:10.1039/c8nr02286k), 2018-01-01
Supplement: c8nr02286k1.pdf [file c8nr02286k1.pdf]

# Supporting Information

## Highly stable Photoelectrochemical Cells for Hydrogen Production using SnO<sub>2</sub>-TiO<sub>2</sub>/Quantum Dots Heterostructured Photoanode

Kaustubh Basu<sup>1</sup>, Hui Zhang<sup>1</sup>, Haiguang Zhao<sup>2\*</sup>, Sayantan Bhattacharya<sup>3</sup>, Fabiola Navarro Pardo<sup>1,4</sup>, Prasanta Kumar Datta<sup>3</sup>, Lei Jin<sup>1</sup>, Shuhui Sun<sup>1</sup>, Fiorenzo Vetrone<sup>1,4</sup>, Federico Rosei<sup>1,4\*</sup>

<sup>1</sup>Institut National de la Recherche Scientifique, Centre Énergie, Matériaux et Télécommunications, Université du Québec, 1650 Boulevard Lionel-Boulet, Varennes, Québec J3X 1S2, Canada

<sup>2</sup>The Cultivation Base for State Key Laboratory, Qingdao University, No. 308 Ningxia Road, Qingdao 266071, PR China

<sup>3</sup>Department of Physics, Indian Institute of Technology Kharagpur, Kharagpur 721302, India

<sup>4</sup>Institute for Fundamental and Frontier Science, University of Electronic Science and Technology of China, Chengdu 610054, PR China

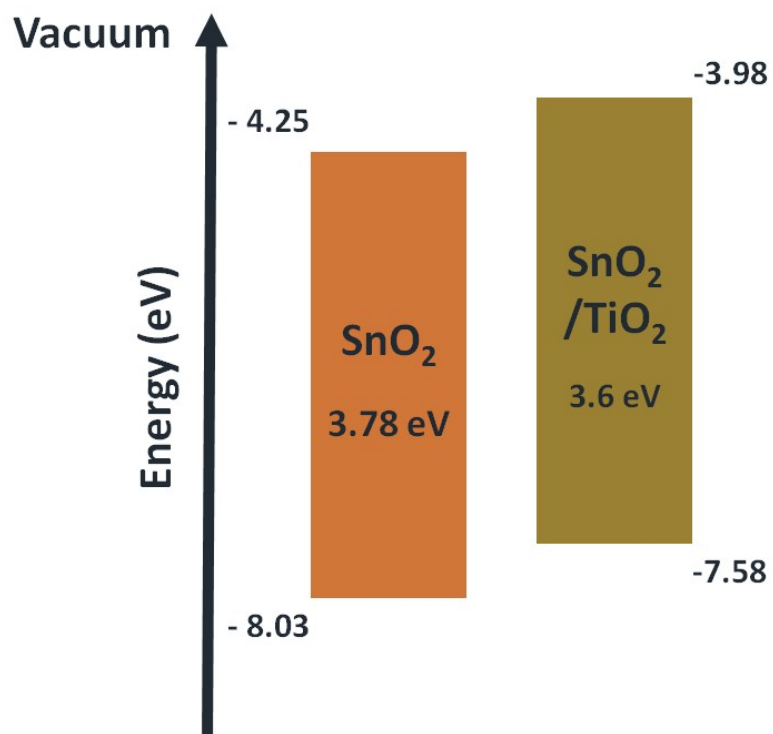

**Figure S1** Band diagram constructed by combining the data from UV photoelectron spectroscopy (UPS) and diffuse reflectance spectroscopy (DRS) of the SnO<sub>2</sub> and SnO<sub>2</sub>/TiO<sub>2</sub> photoanode.<sup>1</sup>

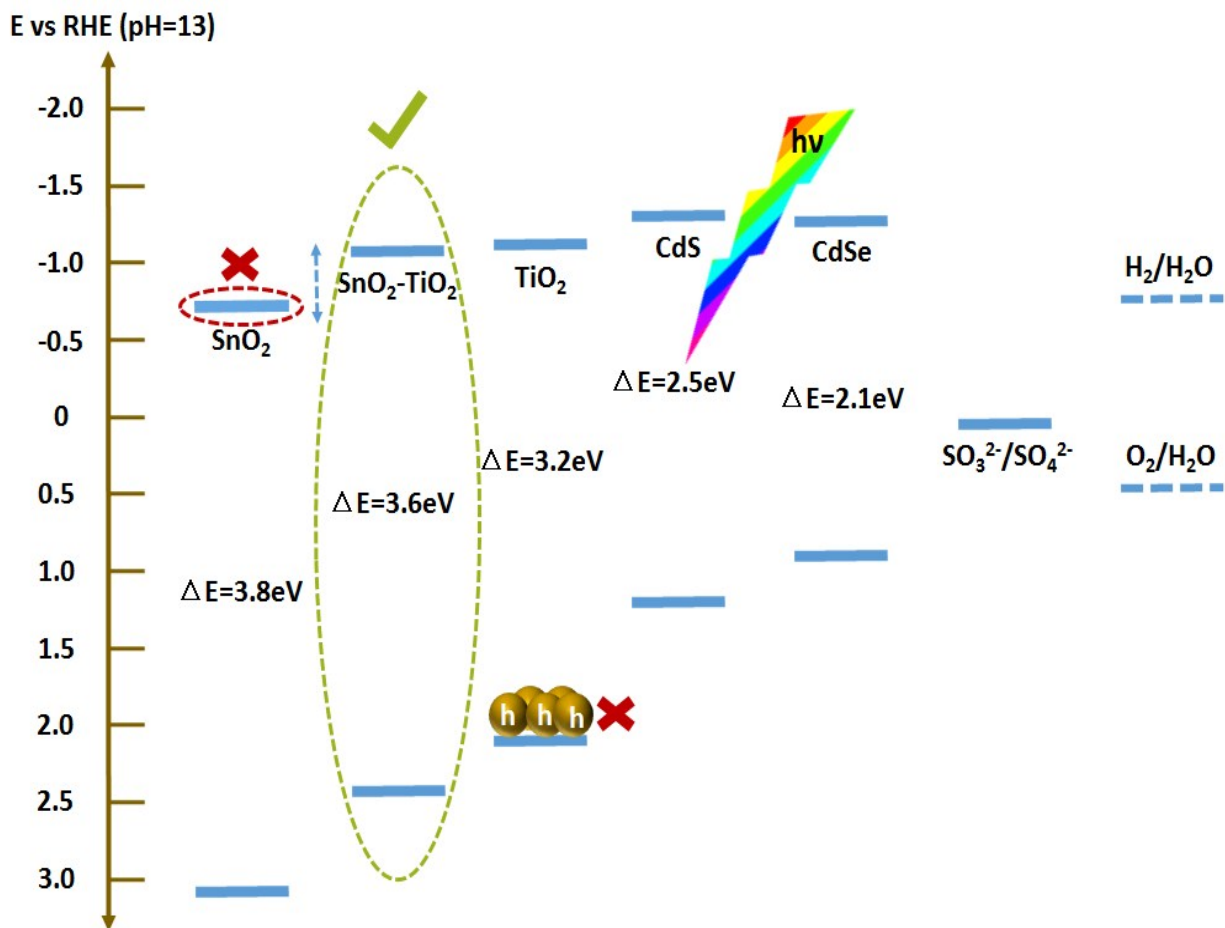

**Figure S2** Band diagram depicting the beneficial effect of using SnO<sub>2</sub>-TiO<sub>2</sub> over traditional TiO<sub>2</sub> photoanode. Approximate energy levels (corresponding to pH=13) of SnO<sub>2</sub>-TiO<sub>2</sub><sup>1</sup>, CdSe, CdS, along with related characteristic redox potentials. The band gap value of CdSe and CdS correspond to QD and bulk semiconductors, respectively. The arrows denote the electron and hole transfer mechanisms.

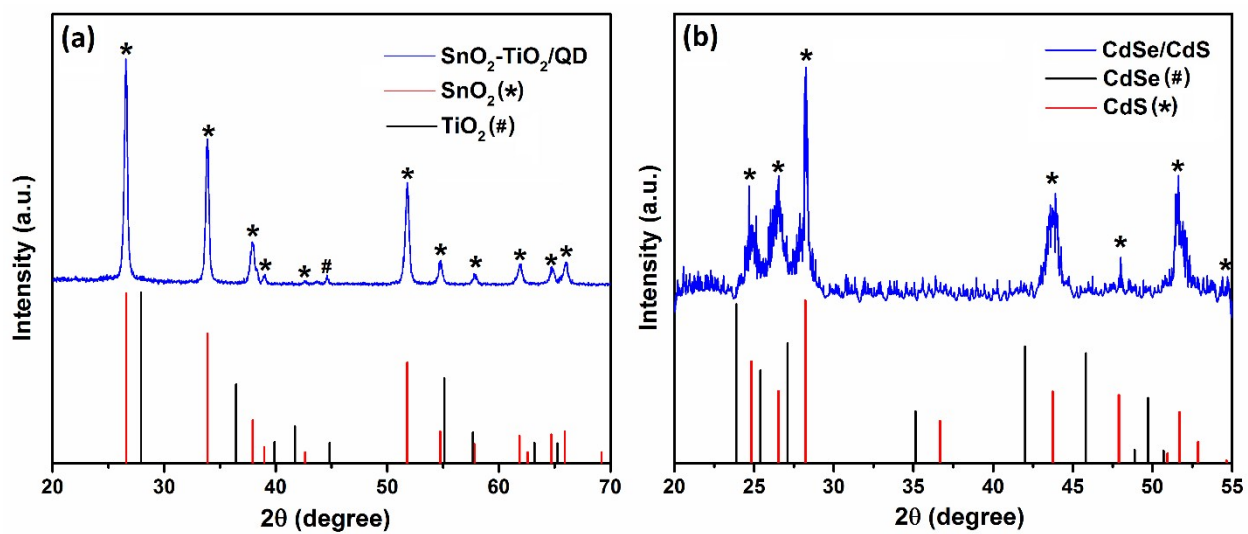

**Figure S3** (a) X-ray diffraction patterns of the  $\text{SnO}_2\text{-TiO}_2/\text{QD}$  photoanode; (b) Grazing angle X-ray diffraction patterns of the CdSe/CdS core/shell QDs on an Si substrate.

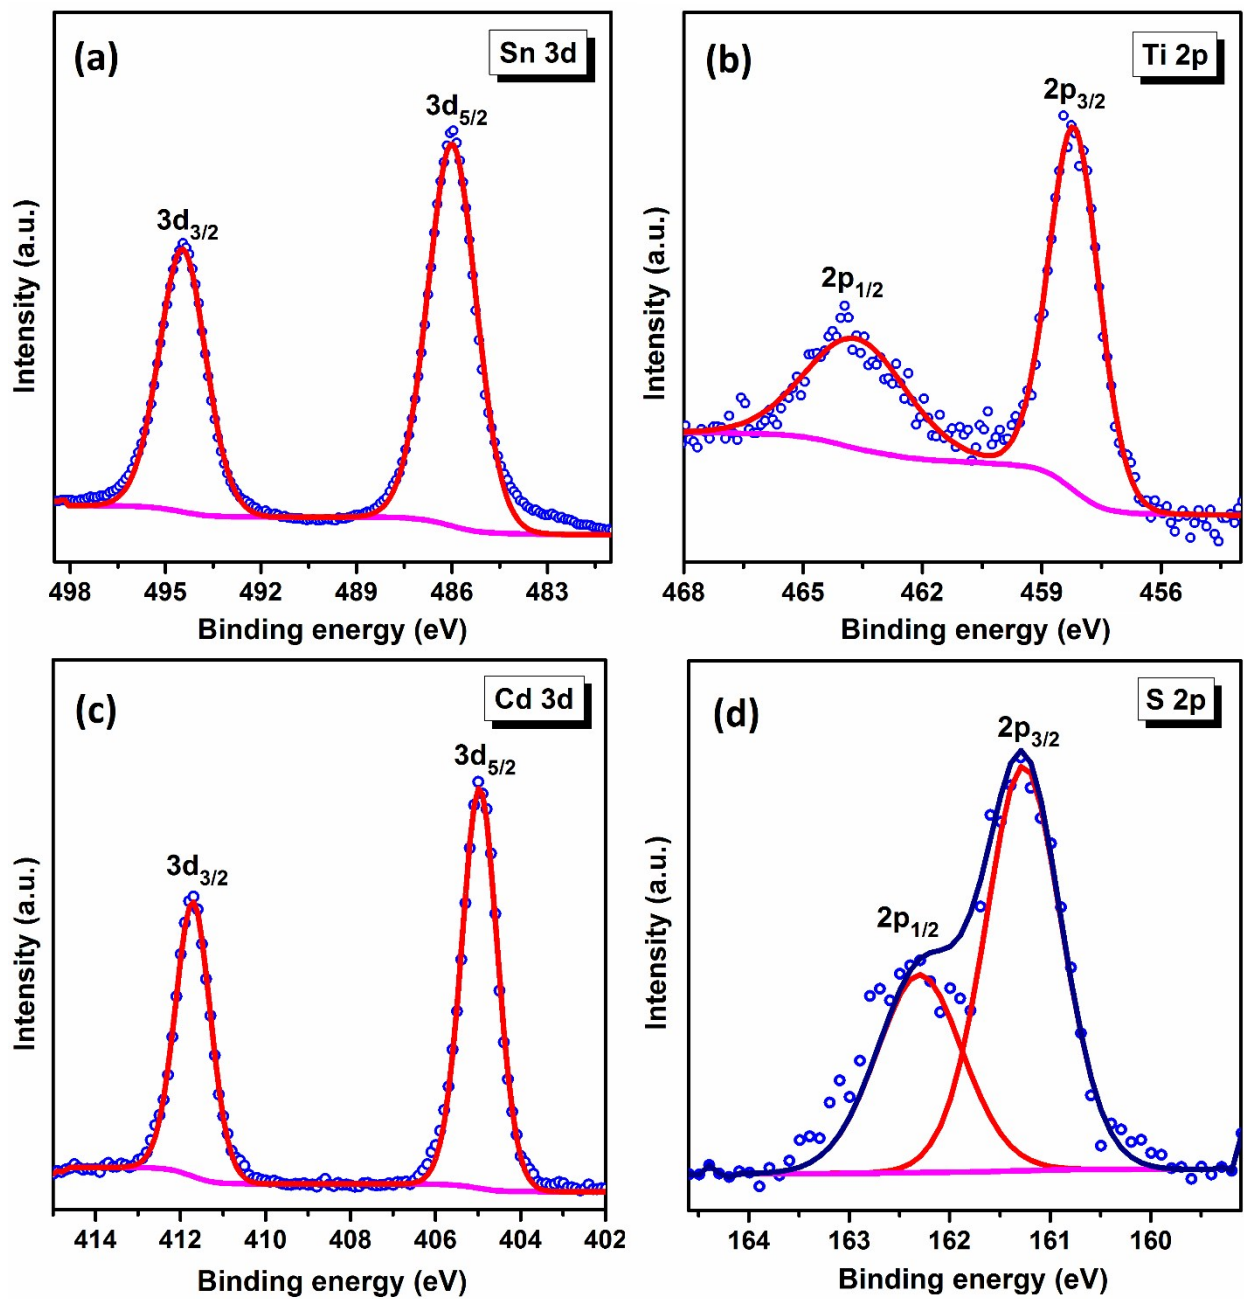

**Figure S4** X-ray photoelectron spectra and curve fits of; (a) Sn 3d peak , (b) Ti 2p peak (c) Cd 3d peak, and (d) S 2p peak for the SnO<sub>2</sub>-TiO<sub>2</sub>/QD photoanode.

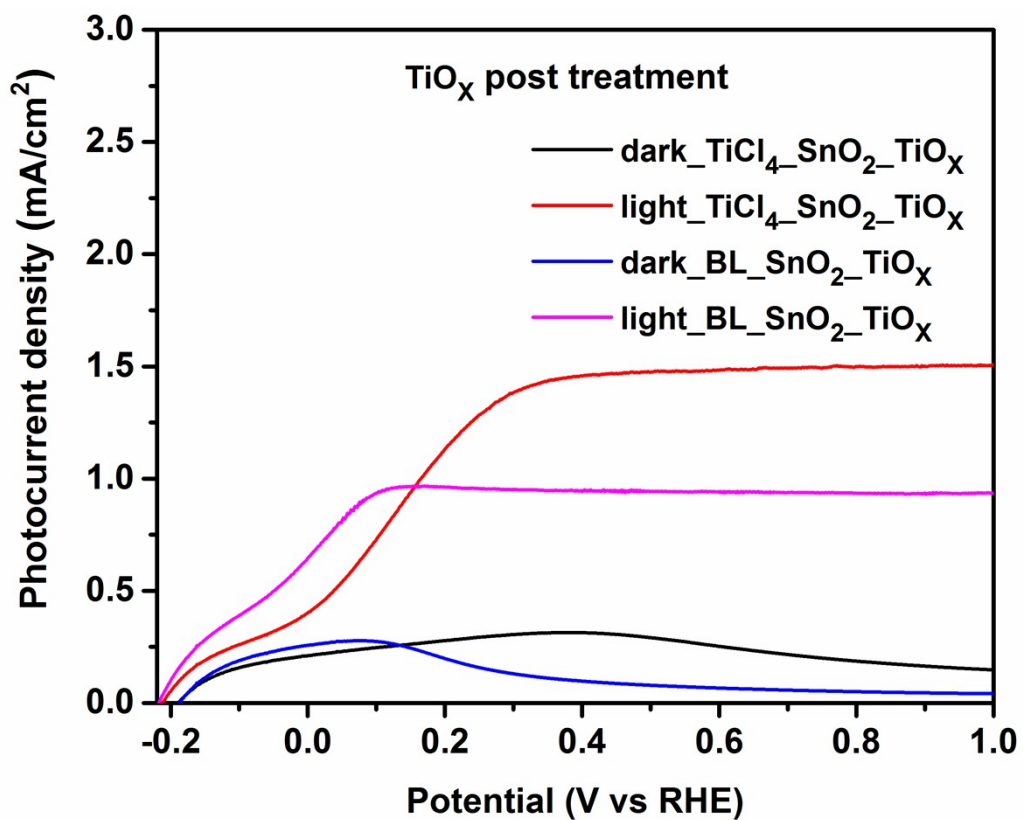

**Figure S5** Photocurrent density versus the applied voltage (vs RHE) for SnO<sub>2</sub>-TiO<sub>2</sub> photoanode PEC cells with different blocking layers.

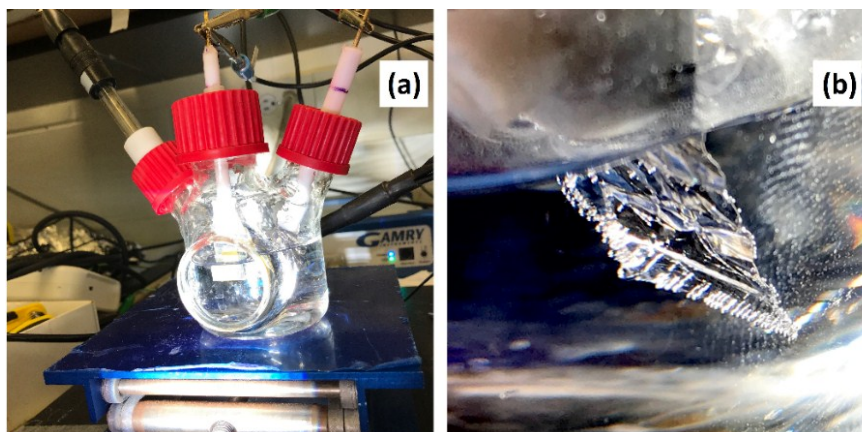

**Figure S6** Three electrode experimental setup for PEC measurement. (b) Magnified image of the Pt CE showing the formation of H<sub>2</sub> bubbles on the surface.

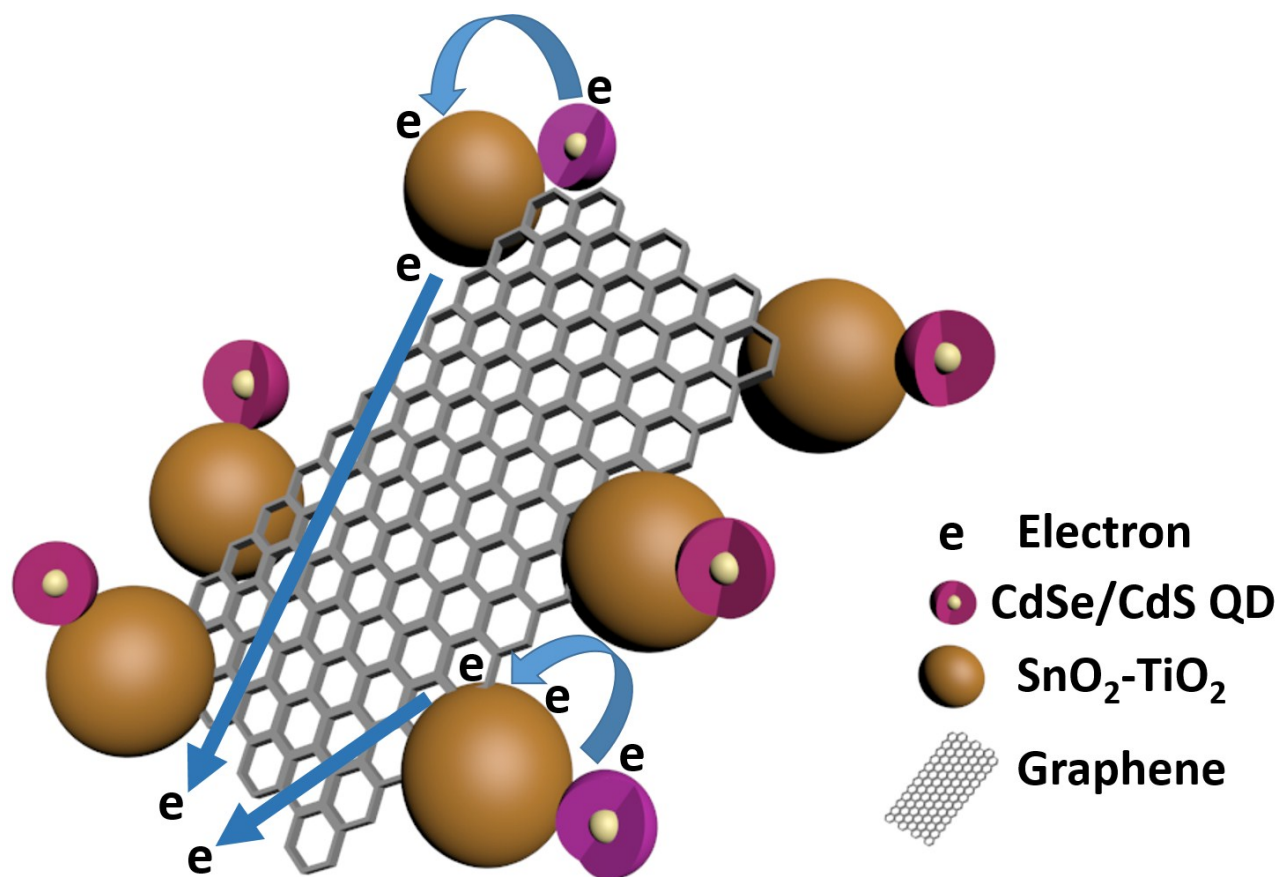

**Figure S7** General schematic for efficient photoelectron transfer via graphene conducting pathways in the composite photoanode sensitized with giant QDs, arrows indicate the electron transfer processes.

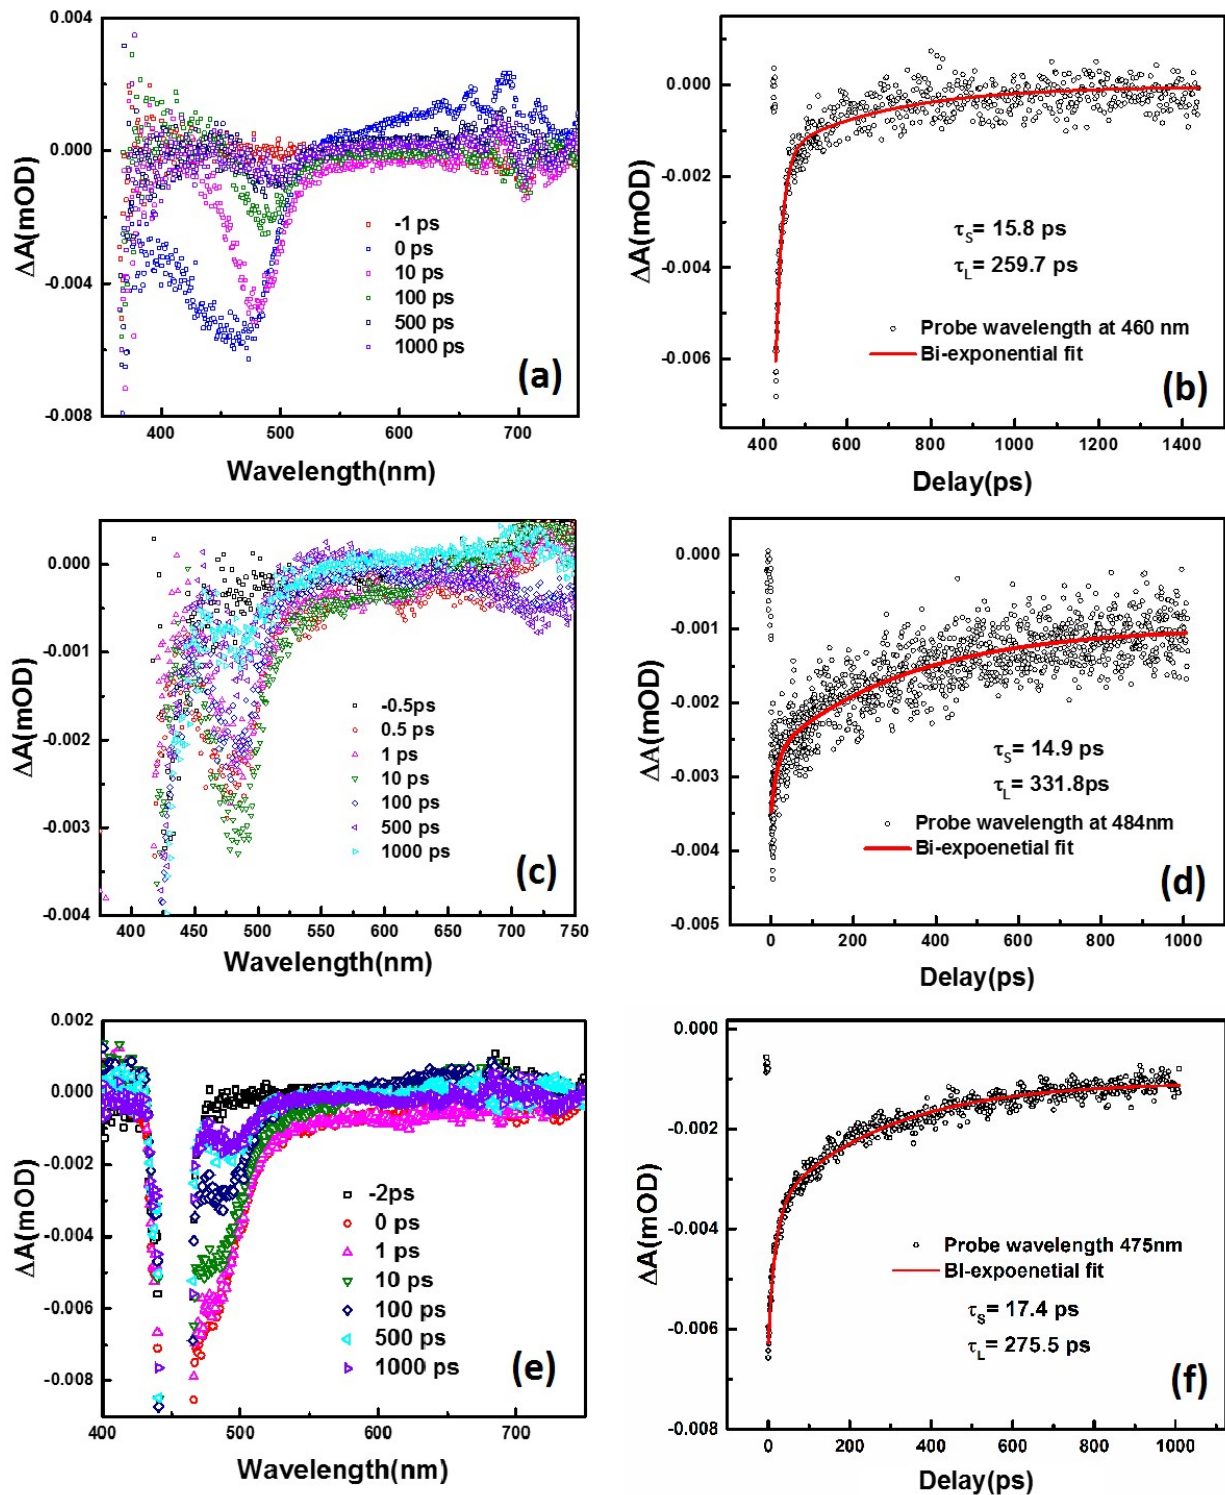

**Figure S8** Transient absorption spectra of ZrO<sub>2</sub>-QD sample pumped at (a) 350 nm, (c) 400 nm, (e) 450 nm with 0.5  $\mu$ J pulse energy; Decay dynamics of ZrO<sub>2</sub>-QD sample pumped at (b) 350 nm, (d) 400 nm, and (f) 450 nm.



## Note 1

We have estimated the H<sub>2</sub> gas evolution within our CdSe/CdS “giant” QD/SnO<sub>2</sub>-TiO<sub>2</sub> photoanode by using the H<sub>2</sub> evolution measurements conducted in a similar system composed of CdSe/CdS “giant” QD /TiO<sub>2</sub> photoanode,<sup>2</sup> Pt as the counter-electrode and a Ag/AgCl saturated reference electrode. The produced H<sub>2</sub> gas in this benchmark system was detected using a Shimadzu GC-8A gas chromatography (GC) device equipped with a thermal conductivity detector. Argon was used as the carrier gas for GC analysis. An air-tight syringe was used for sampling from the vacuum sealed chamber. After 5610, 6280 and 7172 s, the H<sub>2</sub> gas measured was 23.55, 24.65 and 25.61 μmol, respectively. This approach is quite reliable because after 1.5 h, the evolution of the H<sub>2</sub> gas within our benchmark PEC system<sup>2</sup> stabilizes and the photocurrent density is similar to the one produced in this work with the incorporation of 0.1 wt% graphene microplatelets, (~5.6 mA/cm<sup>2</sup>).

The Faradaic Efficiency (FE) was calculated using the formula:<sup>3</sup>

$$FE(\%) = \frac{H_2 \text{ evolved (mol)} \times 2 \times F(\text{Cmol}^{-1})}{\text{Charge passed through WE (C)}} \times 100\%$$
$$= 81.27\%$$

Where, Faraday constant (F) = 96484.34 C/mol

The solar to hydrogen (STH) conversion efficiency was calculated using the formula:<sup>4</sup>

$$STH = \left[ \frac{\left| J_{sc} \left( \frac{\text{mA}}{\text{cm}^2} \right) \right| \times 1.23 \text{ (V)} \times FE}{P \left( \frac{\text{mW}}{\text{cm}^2} \right)} \right]_{AM\ 1.5G}$$
$$= 5.51 \%$$

Where  $J_{sc}$  is the photocurrent density,  $P$  is the input power provided by solar simulator.

When a photoanode for PEC based H<sub>2</sub> generation is used unassisted i.e. without a tandem cell, STH efficiency becomes irrelevant.<sup>4</sup> In such cases, applied bias photon-to-current conversion efficiency (ABPE) may be used to overcome this drawback.<sup>4</sup>

ABPE is defined as:<sup>4</sup>

$$ABPE = \left[ \frac{|J_{photo}| \times (1.23 - V)}{P} \right]_{AM\ 1.5G}$$
$$= 2.89\%$$

Where, V is the voltage that is applied to the cell from an external power source

J<sub>photo</sub> is the photocurrent measured at this voltage.

## References

- 1 K. Basu, D. Benetti, H. Zhao, L. Jin, F. Vetrone, A. Vomiero and F. Rosei, *Sci. Rep.*, 2016, **6**, 1-10.
- 2 R. Adhikari, L. Jin, F. Navarro-Pardo, D. Benetti, B. AlOtaibi, S. Vanka, H. Zhao, Z. Mi, A. Vomiero and F. Rosei, *Nano Energy*, 2016, **27**, 265–274.
- 3 D. W. Wakerley and E. Reisner, *Phys. Chem. Chem. Phys.*, 2014, **16**, 5739–5746.
- 4 H. Dotan, N. Mathews, T. Hisatomi, M. Grätzel and A. Rothschild, *J. Phys. Chem. Lett.*, 2014, **5**, 3330–3334.
